# Supplementary material
Source: PubMed Central journal article supplement (PMC4284066)
Supplement: NIHMS476510-supplement-supplement_1.pdf [file NIHMS476510-supplement-supplement_1.pdf]

## SUPPLEMENTARY DATA

### **Supplementary Figure 1. Multiple doses of Bortezomib regulates CTLA-4.**

Transcript levels of *CTLA-4* are increased with bortezomib, from 0.05 to 10  $\mu$ M. Normal primary CD4<sup>+</sup> T cells were purified as described in Materials and Methods followed by treatment with bortezomib (0.05  $\mu$ M, dotted line with diamond; 0.1  $\mu$ M, dash line with square, and 10  $\mu$ M, dash line with triangle) or untreated (solid line with circle) and concomitant stimulation with PMA/A23187 over a 12 h time course. Total RNA was isolated for qRT-PCR analysis as previously described. Results are the averages of 4 individual normal donors analyzed by qPCR normalized to *B2M* and presented as the fold increase over unstimulated normal cells.

### **Supplementary Figure 2. *NFAT1* and *FOXP3* expression levels are not augmented**

**by bortezomib.** Normal primary CD4<sup>+</sup> T cells were purified as described in Materials Methods followed by treatment with 0  $\mu$ M (solid line with circle), 0.1  $\mu$ M (dashed line with square) or 10  $\mu$ M (dotted line with triangle) bortezomib and stimulation with PMA/A23187 over a 12 h time course with 3 h intervals. Total RNA was isolated for qPCR analysis for **(A)** *NFAT1* and **(B)** *FOXP3* expression levels as previously described. Results are the averages of 4 individual normal donors analyzed by qPCR normalized to *B2M* and presented as the fold increase over unstimulated normal cells  $\pm$  SEM \* $p$ <0.05, \*\* $p$ <0.005.

**Supplementary Figure 3. *GATA3* knockdown by siRNA leads to decreased *IL-4* transcription but not *GAPDH* with bortezomib.** Samples were prepared as in Figure 6. Transcript levels of **(A) *IL-4*** and **(B) *GAPDH*** were measured by qPCR for samples treated with siCTRL (black bars) or si*GATA3* (white bars) as previously described. Results are presented as averages of three independent experiments  $\pm$  SEM (\* $p < 0.05$ ).

**Supplementary Figure 4.** Bortezomib treatment and apoptosis in primary CD4+ T cells. Cells were treated with the bortezomib concentration as indicated (green equals 0.1  $\mu$ M, blue equals 10  $\mu$ M) and stimulated with PMA/A23187 as described in the Materials and Methods. The cells were stained with Annexin V and analyzed by flow cytometry. Results are representative of three experiments.

**Supplementary Table I. PCR Primer Sets**

| Gene   | Forward                   | Reverse                  |
|--------|---------------------------|--------------------------|
| B2M    | TCTACTTTGAGTGCTGTCTCCATGT | AAGTTGCCAGCCCTCCTAGAG    |
| CTLA-4 | CTACCTGGGCATAGGCAACG      | CCCCGAACTAACTGCTGCAA     |
| FoxP3  | ATCCGCCACAACCTGAGTCT      | GTCCACACAGCCCCCTTCT      |
| GAPDH  | CCCACTCCTCCACCTTTGAC      | CATACCAGGAAATGAGCTTGACAA |
| GATA3  | TCTGGAGGAGGAATGCCAAT      | CCGGGTAAACGAGCTGTTC      |

|                    |                                |                                |
|--------------------|--------------------------------|--------------------------------|
| <b>IL-4</b>        | <b>CACAGGCACAAGCAGCTGAT</b>    | <b>CTCTGGTTGGCTTCCTTCACA</b>   |
| <b>NFAT1</b>       | <b>TCCTGGAGATACCCTTGGAGC</b>   | <b>AGTCGATGGTTGCCCTCATG</b>    |
| <b>ChIP CTLA-4</b> | <b>GAGGACCCTTGTA CTCCAGGAA</b> | <b>CGAAAAGACAACCTCAAGCACTC</b> |

# Supplementary Figure 1

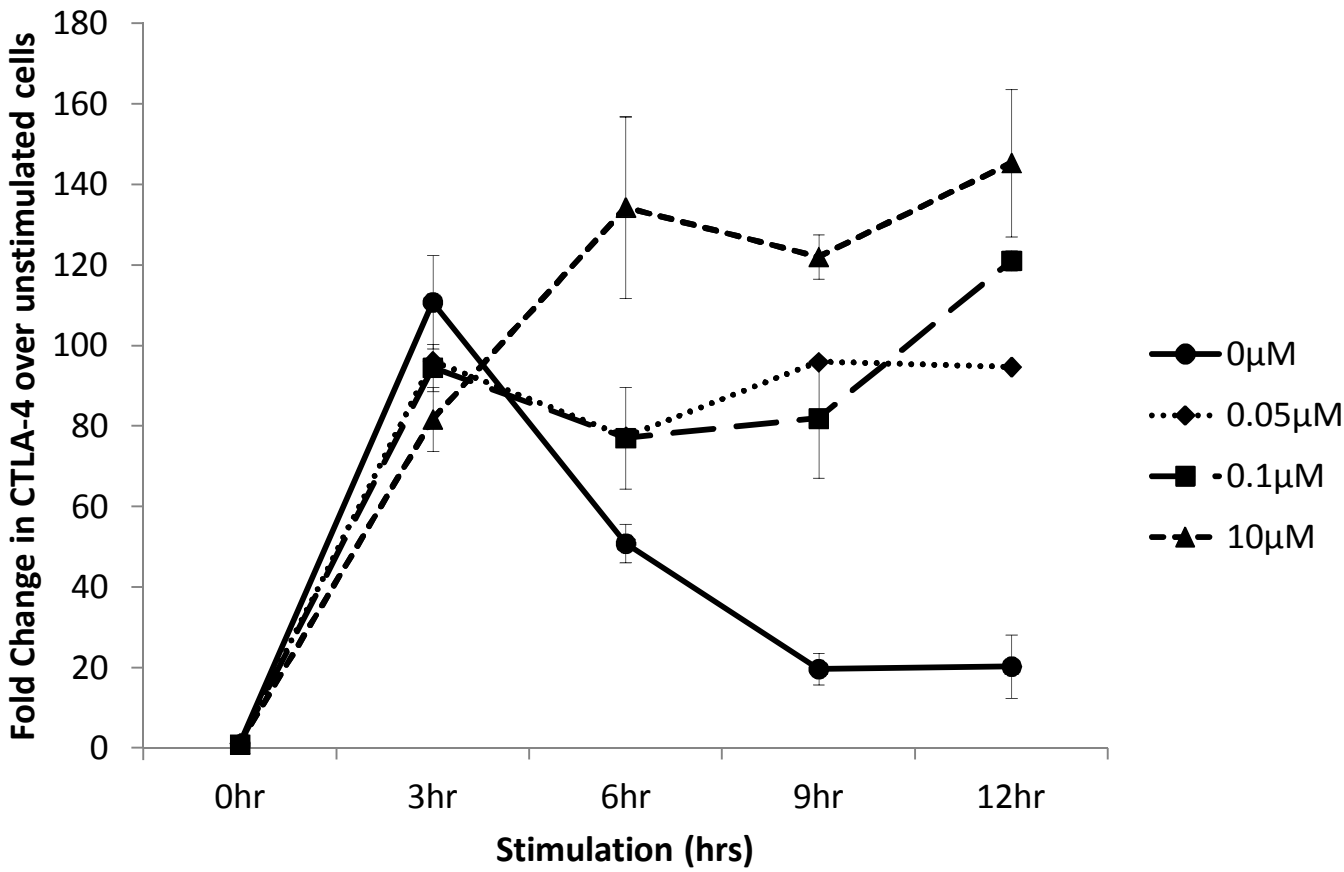

# Supplementary Figure 2

(A)

*NFAT1*

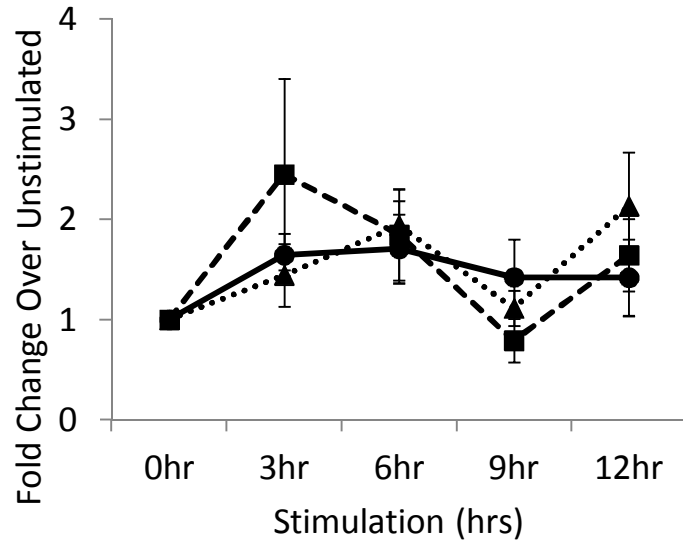

(B)

*FOXP3*

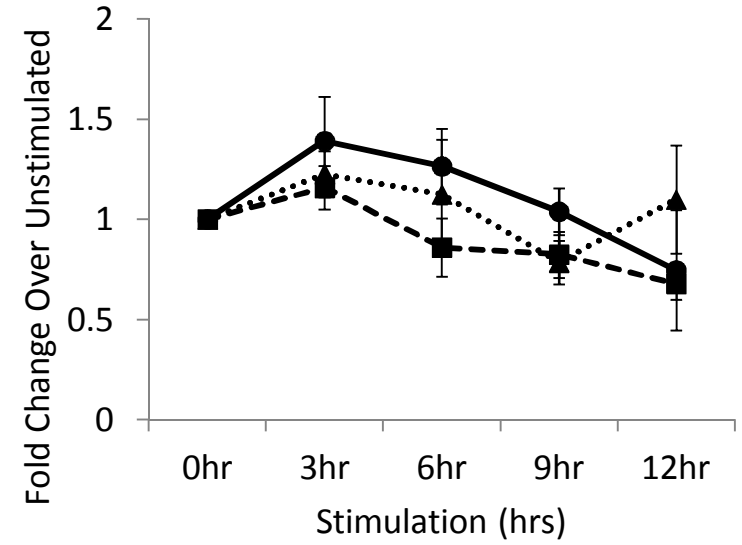

# Supplementary Figure 3

(A)

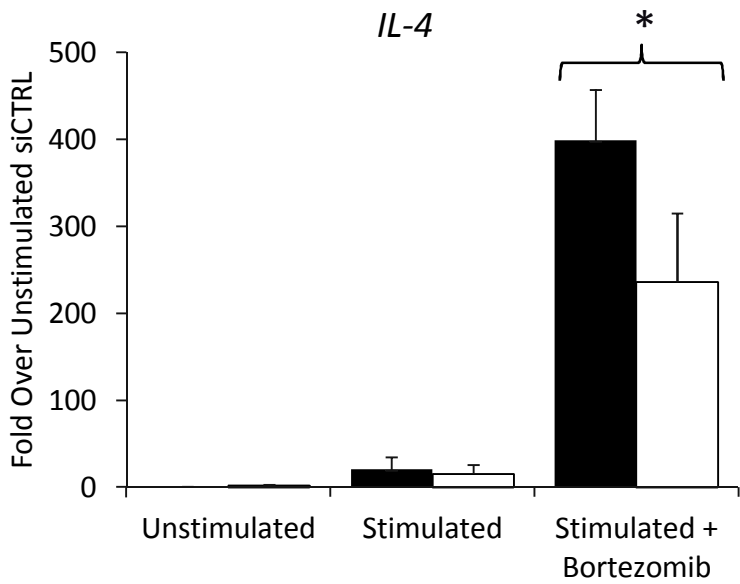

(B)

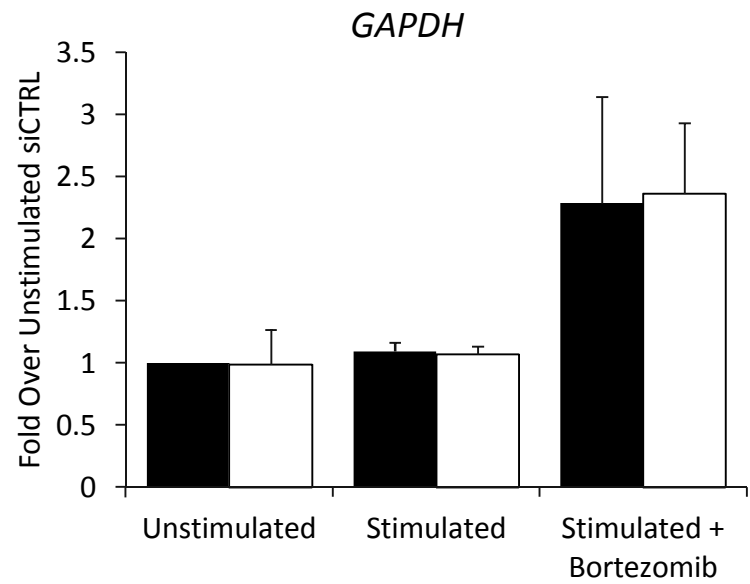

# Supplementary Figure 4

6hr

9hr

12hr

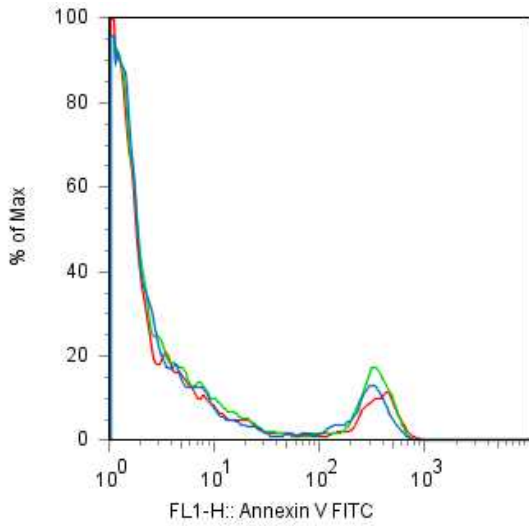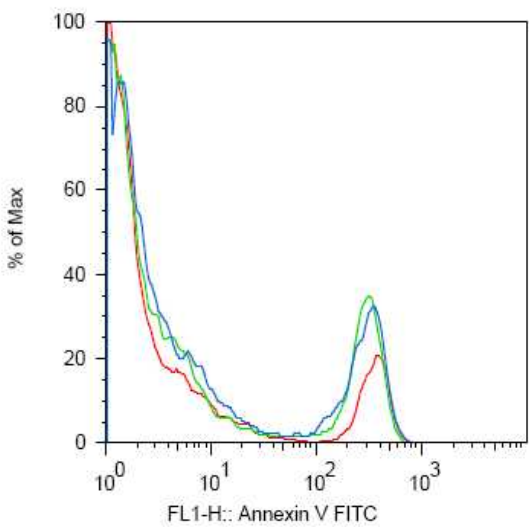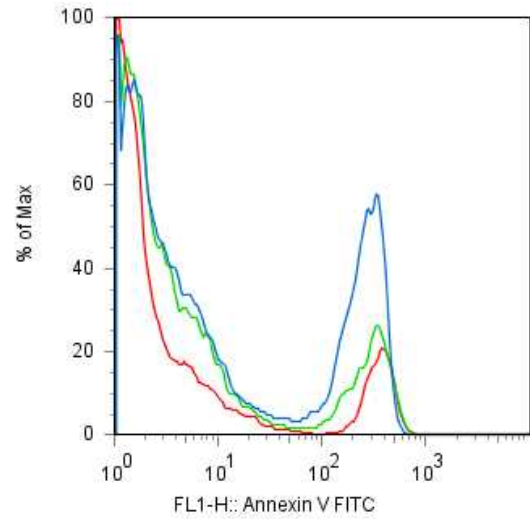

- 0 μM
- 0.1 μM
- 10 μM
